# Supplementary material for: Rapid, scalable and highly automated HLA genotyping using next-generation sequencing: a transition from research to diagnostics
Source: PubMed Central journal article supplement (PMC3639865; doi:10.1186/1471-2164-14-221), 2013-04-04
Supplement: 1471-2164-14-221-S2.pdf [file 1471-2164-14-221-S2.pdf]

### Additional file 2 – ATF 4.7 interface and HLA-C\*03:03:01, 03:04:01:01 assignment.

Sequence reads are aligned to exon 1, 2, 3, 4 and 7. The only difference between HLA-C\*03:03:01 and C\*03:04:01:01 is located at the end of exon 2. The inability to call this genotype with the older ATF version was automatically solved by ATF 4.7. The blue bar indicate the variation (nt756 R=A+G) at the last position of exon 2.

The screenshot displays the ATF 4.7 interface with a sequence alignment view. The top toolbar includes options for DNA (HLA v1), Edit, Type (Genotyping), and various display settings like Dots, Unaligned, and Sort. The main window shows a genomic map with exons and introns, and a detailed alignment of sequence reads. A blue bar highlights a variation at position 756 (R=A+G) at the end of exon 2. A pop-up window for 'Sample 26' is visible, showing sequence navigation controls and variant calling options.

| Sample        | Sequence                                          | Allele 1   | Allele 2      | MM | N-C | Differences |
|---------------|---------------------------------------------------|------------|---------------|----|-----|-------------|
| Sample 01     | ...AGTGAGTGACCCCGGCCCGGGGCGCAGG                   | C*03:03:01 | C*03:04:01:01 | 0  | 0   |             |
| Sample 05     | CCGAGTGAGCCTGCGGAACCTGCGCGGCTACTACAACCAGAGCGAGGCC | C*03:03:01 | C*03:04:01:02 | 0  | 0   | 3'UTR       |
| Sample 07     | CCGAGTGAGCCTGCGGAACCTGCGCGGCTACTACAACCAGAGCGAGGCC | C*03:03:01 | C*03:03:01    | 1  | 1   |             |
| Sample 11     | CCGAGTGAGCCTGCGGAACCTGCGCGGCTACTACAACCAGAGCGAGGCC | C*03:03:01 | C*03:03:01    | 1  | 1   |             |
| Sample 15     | >> gC.E2.F1.84-2                                  | C*03:03:01 | C*03:04:02    | 1  | 1   |             |
| Sample 18     | CCGAGTGAGCCTGCGGAACCTGCGCGGCTACTACAACCAGAGCGAGGCC | C*03:03:01 | C*03:04:03    | 1  | 1   |             |
| Sample 20     | << gC.E2.R1.77-3                                  | C*03:03:01 | C*03:04:04    | 1  | 1   |             |
| Sample 21     |                                                   | C*03:03:01 | C*03:04:05    | 1  | 1   |             |
| Sample 23     |                                                   | C*03:03:01 | C*03:04:07    | 1  | 1   |             |
| Sample 24     |                                                   | C*03:03:01 | C*03:04:08    | 1  | 1   |             |
| Sample 25     |                                                   | C*03:03:01 | C*03:04:09    | 1  | 1   |             |
| Sample 26* gC |                                                   | C*03:03:01 | C*03:04:10    | 1  | 1   |             |
|               |                                                   | C*03:03:01 | C*03:04:11    | 1  | 1   |             |
|               |                                                   | C*03:03:01 | C*03:04:12    | 1  | 1   |             |
|               |                                                   | C*03:03:01 | C*03:04:13    | 1  | 1   |             |
|               |                                                   | C*03:03:01 | C*03:04:14    | 1  | 1   |             |
|               |                                                   | C*03:03:01 | C*03:04:15    | 1  | 1   |             |
|               |                                                   | C*03:03:01 | C*03:04:16    | 1  | 1   |             |
