# Supplementary material for: Rapid, scalable and highly automated HLA genotyping using next-generation sequencing: a transition from research to diagnostics
Source: PubMed Central journal article supplement (PMC3639865; doi:10.1186/1471-2164-14-221), 2013-04-04

# tiGSj048-2011d

| Sequencing Run |                | Run Processor Results     |                     |
|----------------|----------------|---------------------------|---------------------|
| Name           | tiGSj048-2011d | Run date                  | 2011/12/30 10:01:34 |
| Regions        | 1              | Total Bases Passed Filter | 36,891,809          |
| Cycles         | 200            | Passed Filter Wells       | 79,050              |

| Library Region      | 1       | Median  | Total   |
|---------------------|---------|---------|---------|
| Raw Wells           | 179,605 | 179,605 | 179,605 |
| Key Pass Wells      | 170,345 | 170,345 | 170,345 |
| Median ReadLength   | 494.00  |         | 494.00  |
| Passed Filter Wells | 79,050  | 79,050  | 79,050  |
| % Dot + Mixed       | 9.60    | 9.60    | 9.60    |
| % Short             | 43.99   | 43.99   | 43.99   |
| % Passed Filter     | 46.41   | 46.41   | 46.41   |

| Control Sequences |              | 1       | Median  | Total   |
|-------------------|--------------|---------|---------|---------|
| Raw Wells         |              | 179,605 | 179,605 | 179,605 |
| All ATGC Wells    |              | 3,925   | 3,925   | 3,925   |
| All CATG Wells    |              | 2,813   | 2,813   | 2,813   |
| %Match            | 400 bp, 100% | 49.66   | 49.66   | 49.66   |
|                   | >=98%        | 81.73   | 81.73   | 81.73   |
|                   | >=95%        | 88.71   | 88.71   | 88.71   |

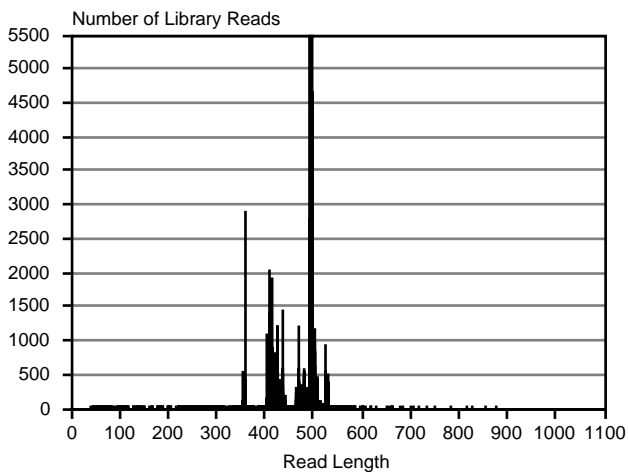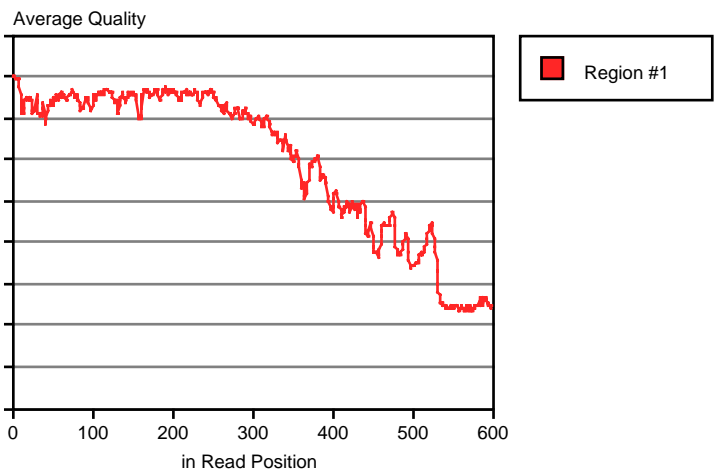

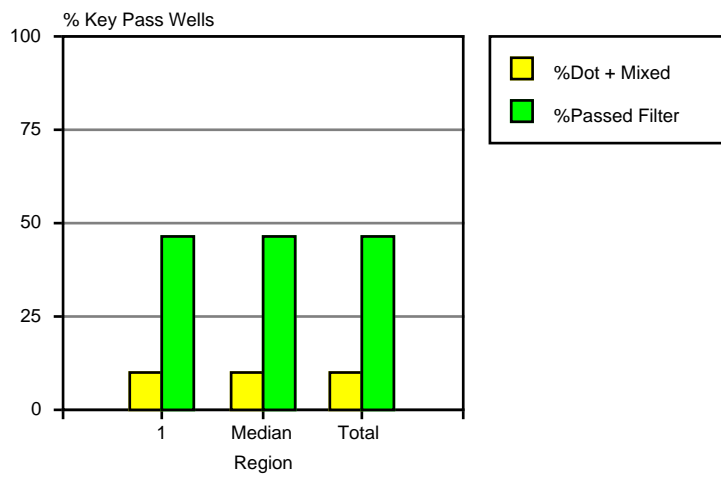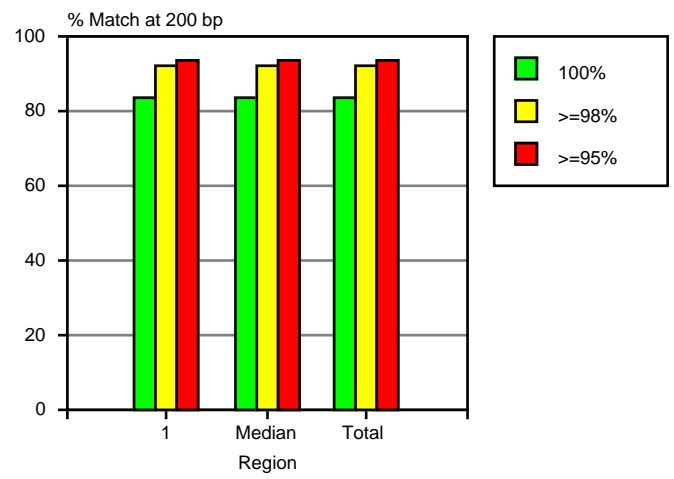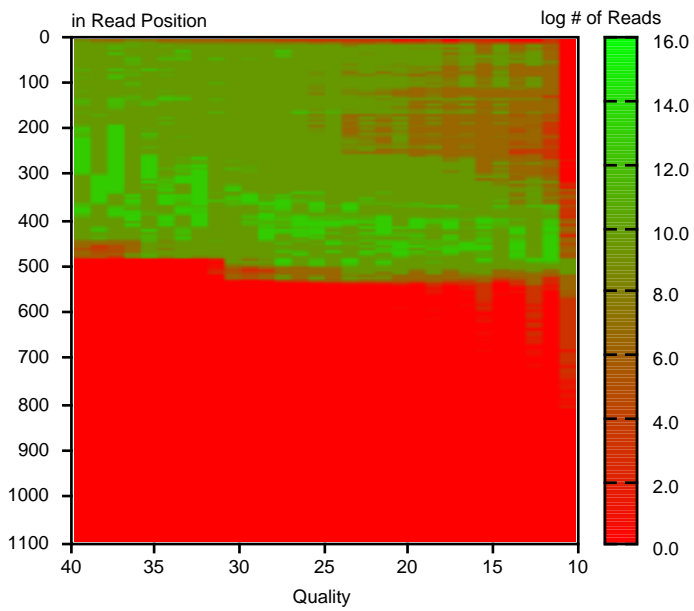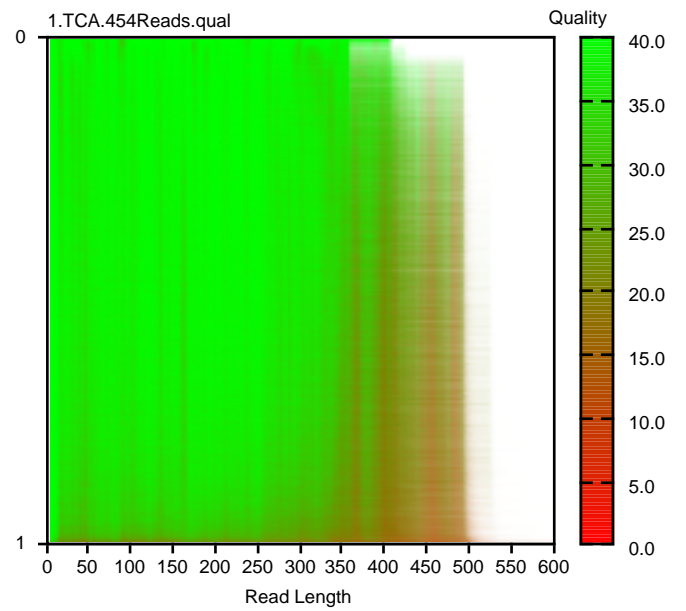

Supplement: 1471-2164-14-221-S4.pdf [file 1471-2164-14-221-S4.pdf]
